# Supplementary material
Source: PubMed Central journal article supplement (PMC7334106)
Supplement: NIHMS1589587-supplement-316415_Major_Resources_Table.pdf [file NIHMS1589587-supplement-316415_Major_Resources_Table.pdf]

## Major Resources Table

In order to allow validation and replication of experiments, all essential research materials listed in the Methods should be included in the Major Resources Table below. Authors are encouraged to use public repositories for protocols, data, code, and other materials and provide persistent identifiers and/or links to repositories when available. Authors may add or delete rows as needed.

### Genetically Modified Animals

|        | Species                                      | Vendor or Source       | Background Strain | Other Information | Persistent ID / URL |
|--------|----------------------------------------------|------------------------|-------------------|-------------------|---------------------|
| Parent | <i>A1cf<sup>Tg</sup>(Myh6-cre/Esr1*)1Jmk</i> | The Jackson Laboratory | C57BL/6J          |                   | MGI:3050453         |
| Parent | <i>Tjp1<sup>tm2c(KOMP)Wtsi</sup></i>         | Jerrold Turner         | C57BL/6           |                   | MGI:6272009         |
| Parent | <i>Hcn4<sup>tm2.1(cre/ERT2)Sev</sup></i>     | Sylvia Evans           | C57BL/6           |                   | MGI:5529675         |
| Parent | <i>Tg(Kcne1-cre/ERT2)1I mos</i>              | Ivan Moskowitz         | C57BL/6           |                   | MGI:5301931         |

### Antibodies

| Target antigen   | Vendor or Source          | Catalog # | Working concentration                   | Persistent ID / URL                                                                                                                                                                                                 |
|------------------|---------------------------|-----------|-----------------------------------------|---------------------------------------------------------------------------------------------------------------------------------------------------------------------------------------------------------------------|
| ZO-1             | Thermo Fisher             | 339100    | 1:1000 for western blot<br>1:500 for IF | <a href="https://www.thermofisher.com/antibody/product/ZO-1-Antibody-clone-ZO1-1A12-Monoclonal/33-9100">https://www.thermofisher.com/antibody/product/ZO-1-Antibody-clone-ZO1-1A12-Monoclonal/33-9100</a>           |
| CAR              | Santa Cruz Biotechnology  | sc-373791 | 1:300 for western blot<br>1:200 for IF  | <a href="https://www.scbt.com/p/car-antibody-e-1">https://www.scbt.com/p/car-antibody-e-1</a>                                                                                                                       |
| Cx40             | Thermo Fisher             | 37-8900   | 1:300 for western blot<br>1:200 for IF  | <a href="https://www.thermofisher.com/antibody/product/Connexin-40-Antibody-clone-2F9A11-Monoclonal/37-8900">https://www.thermofisher.com/antibody/product/Connexin-40-Antibody-clone-2F9A11-Monoclonal/37-8900</a> |
| β-catenin        | Cell Signaling Technology | 9562      | 1:300 for western blot<br>1:250 for IF  | <a href="https://www.cellsignal.com/products/primary-antibodies/b-catenin-antibody/9562">https://www.cellsignal.com/products/primary-antibodies/b-catenin-antibody/9562</a>                                         |
| HCN4             | Abcam                     | ab32675   | 1:300 for western blot                  | <a href="https://www.abcam.com/hcn4-antibody-shg-1e5-ab32675.html">https://www.abcam.com/hcn4-antibody-shg-1e5-ab32675.html</a>                                                                                     |
| mouse IgG (HRP)  | Cell Signaling Technology | 7076      | 1:1000 for western blot                 | <a href="https://www.cellsignal.com/products/secondary-antibodies/anti-mouse-igg-hrp-linked-antibody/7076">https://www.cellsignal.com/products/secondary-antibodies/anti-mouse-igg-hrp-linked-antibody/7076</a>     |
| rat IgG (HRP)    | Cell Signaling Technology | 7077      | 1:1000 for western blot                 | <a href="https://www.cellsignal.com/products/secondary-antibodies/anti-rat-igg-hrp-linked-antibody/7077">https://www.cellsignal.com/products/secondary-antibodies/anti-rat-igg-hrp-linked-antibody/7077</a>         |
| rabbit IgG (HRP) | Cell Signaling Technology | 7074      | 1:1000 for western blot                 | <a href="https://www.cellsignal.com/products/secondary-antibodies/anti-rabbit-igg-hrp-linked-antibody/7074">https://www.cellsignal.com/products/secondary-antibodies/anti-rabbit-igg-hrp-linked-antibody/7074</a>   |
| ZO-2             | Thermo Fisher             | 71-1400   | 1:200                                   | <a href="https://www.thermofisher.com/antibody/product/ZO-2-Antibody-Polyclonal/71-1400">https://www.thermofisher.com/antibody/product/ZO-2-Antibody-Polyclonal/71-1400</a>                                         |
| Cx43             | Cell signaling technology | 3512      | 1:250                                   | <a href="https://www.cellsignal.com/products/primary-antibodies/connexin-43-antibody/3512">https://www.cellsignal.com/products/primary-antibodies/connexin-43-antibody/3512</a>                                     |
| JUP              | Abcam                     | ab11799   | 1:250                                   | <a href="https://www.abcam.com/gamma-catenin-antibody-ab11799.html">https://www.abcam.com/gamma-catenin-antibody-ab11799.html</a>                                                                                   |
| Nav1.5           | Abcam                     | ab56240   | 1:250                                   | <a href="https://www.abcam.com/nav15scn5a-antibody-ab56240.html">https://www.abcam.com/nav15scn5a-antibody-ab56240.html</a>                                                                                         |
| N-cadherin       | Thermo Fisher             | 333900    | 1:250                                   | <a href="https://www.thermofisher.com/antibody/product/N-cadherin-Antibody-clone-3B9-Monoclonal/33-3900">https://www.thermofisher.com/antibody/product/N-cadherin-Antibody-clone-3B9-Monoclonal/33-3900</a>         |
| Cx45             | Thermo Fisher             | PA5-      | 1:250                                   | <a href="https://www.thermofisher.com/antibody/product/Connexin-45-Antibody-clone-PA5-Monoclonal/33-3900">https://www.thermofisher.com/antibody/product/Connexin-45-Antibody-clone-PA5-Monoclonal/33-3900</a>       |

DOI [to be added]

|            |                                      |             |        |                                                                                                                                                                                                           |
|------------|--------------------------------------|-------------|--------|-----------------------------------------------------------------------------------------------------------------------------------------------------------------------------------------------------------|
|            |                                      | 77357       |        | <a href="http://www.angioproteomie.com/commerce/ccp1141-rat-monoclonal-anti-mouse-pecam-1-map-0032.htm">xin-45-Antibody-Polyclonal/PA5-77357</a>                                                          |
| CD31       | Antio-Proteomie                      | mAP-0032    | 1:250  | <a href="http://www.angioproteomie.com/commerce/ccp1141-rat-monoclonal-anti-mouse-pecam-1-map-0032.htm">http://www.angioproteomie.com/commerce/ccp1141-rat-monoclonal-anti-mouse-pecam-1-map-0032.htm</a> |
| Mouse IgG  | Jackson Immuno Research Laboratories | 711-586-152 | 1:1000 | <a href="https://www.jacksonimmuno.com/catalog/products/711-586-152">https://www.jacksonimmuno.com/catalog/products/711-586-152</a>                                                                       |
| Rabbit IgG | Jackson Immuno Research Laboratories | 715-546-151 | 1:1000 | <a href="https://www.jacksonimmuno.com/catalog/products/715-546-151">https://www.jacksonimmuno.com/catalog/products/715-546-151</a>                                                                       |
| GAPDH      | Cell Signaling Technology            | 5174        | 1:1000 | <a href="https://www.cellsignal.com/products/primary-antibodies/gapdh-d16h11-xp-rabbit-mab/5174">https://www.cellsignal.com/products/primary-antibodies/gapdh-d16h11-xp-rabbit-mab/5174</a>               |

### DNA/cDNA Clones

| Clone Name | Sequence | Source / Repository | Persistent ID / URL |
|------------|----------|---------------------|---------------------|
|            |          |                     |                     |
|            |          |                     |                     |
|            |          |                     |                     |

### Data & Code Availability

| Description | Source / Repository | Persistent ID / URL |
|-------------|---------------------|---------------------|
|             |                     |                     |
|             |                     |                     |
|             |                     |                     |

### Other

| Description                | Source / Repository | Persistent ID /AI URL                                                                                                                                                                                                     |
|----------------------------|---------------------|---------------------------------------------------------------------------------------------------------------------------------------------------------------------------------------------------------------------------|
| Alexa Fluor 647-phalloidin | Thermo Fisher       | <a href="https://www.thermofisher.com/order/catalog/product/A22287#/A22287">https://www.thermofisher.com/order/catalog/product/A22287#/A22287</a>                                                                         |
| Hoechst 33342              | Thermo Fisher       | <a href="https://www.thermofisher.com/order/catalog/product/62249?SID=srch-srp-62249#/62249?SID=srch-srp-62249">https://www.thermofisher.com/order/catalog/product/62249?SID=srch-srp-62249#/62249?SID=srch-srp-62249</a> |
|                            |                     |                                                                                                                                                                                                                           |
