# Supplementary material
Source: PubMed Central journal article supplement (PMC7334106)

Full unedited gels for Figure 1C

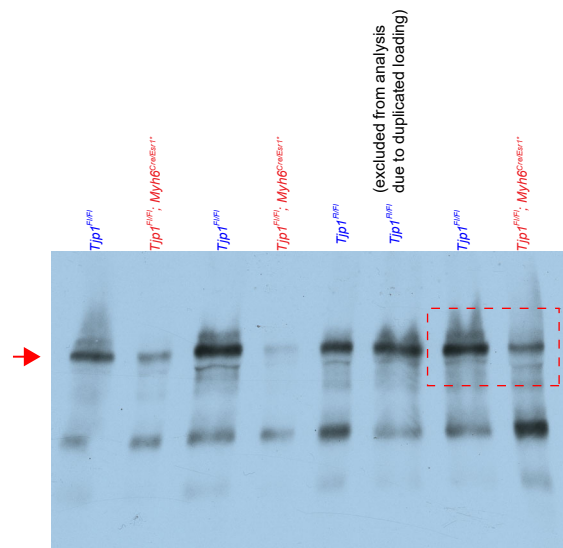

Full unedited gels for Figure 4K

ZO-1

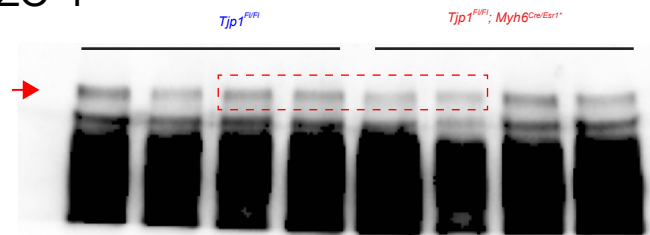

Cx40

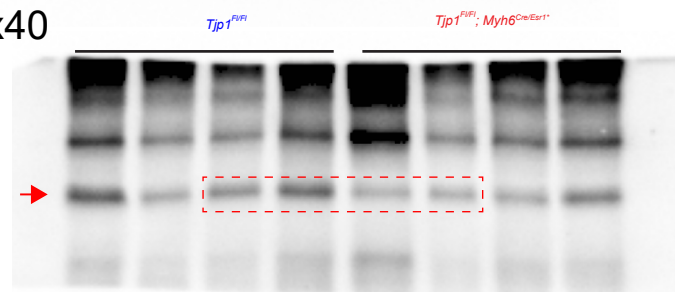

GAPDH

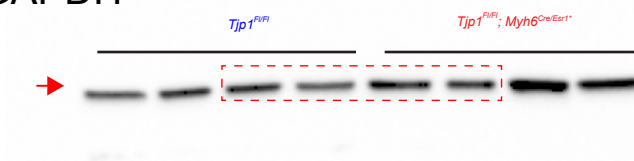

CAR

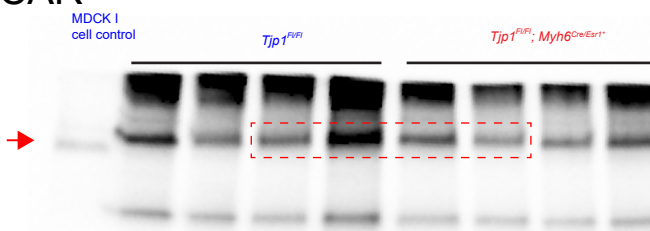

Full unedited gels for Figure 4J  
HCN4

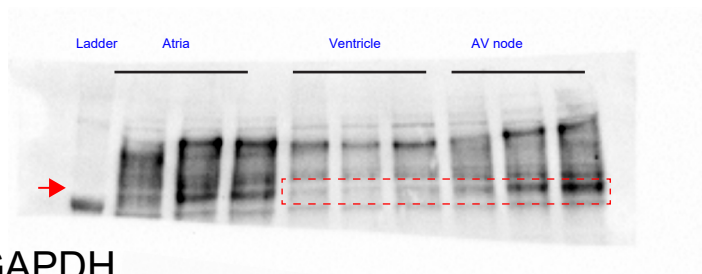

GAPDH

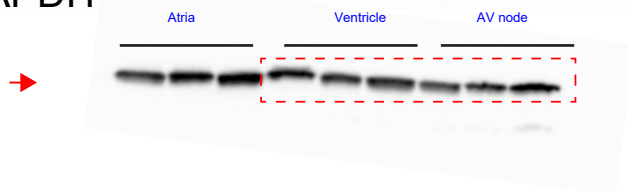

$\beta$ -catenin

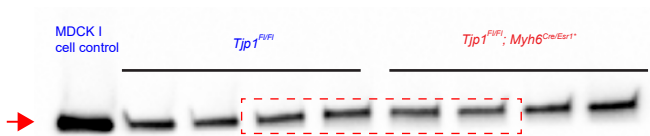

GAPDH

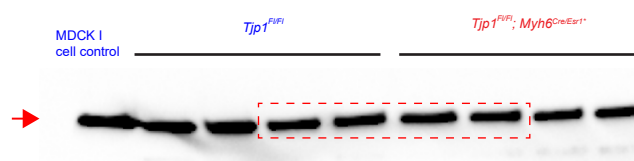

Supplement: NIHMS1589587-supplement-316415_Uncut_Gel_Blots.pdf [file NIHMS1589587-supplement-316415_Uncut_Gel_Blots.pdf]
